# Supplementary material for: QD-aptamer as a donor for a FRET-based chemosensor and evaluation of affinity between acetamiprid and its aptamer
Source: Royal Society of Chemistry journal article supplement (doi:10.1039/c6ra26118c), 2017-01-01
Supplement: c6ra26118c1.pdf [file c6ra26118c1.pdf]

Supporting materials

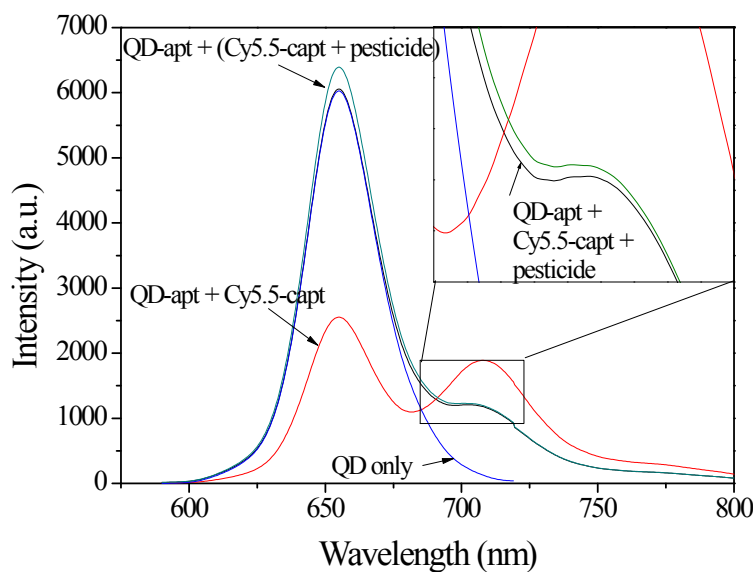

Figure S1. Emission spectra for complexes of bared QD, QD-apt and Cy5.5-capt, QD-apt with Cy5.5-capt and acetamiprid, as well as mixture of Cy5.5-capt and acetamiprid before QD-apt added.

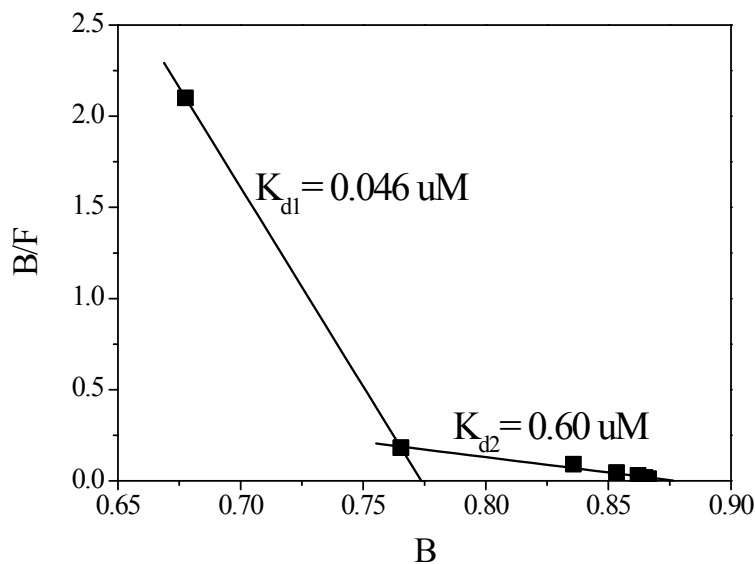

Figure S2. Scatchard plotting for the determination of affinity adsorption  $K_{d1}$  ( $0.046 \mu\text{mol/L}$ ) and general adsorption  $K_{d2}$  ( $0.60 \mu\text{mol/L}$ ).

**Table. S1** Determination of acetamiprid in water samples by the proposed method

| Sample     | Spiked Concentration (µg/L) | Detected Concentration (µg/L) | Standard Deviation (µg/L) | Recovery (%) |
|------------|-----------------------------|-------------------------------|---------------------------|--------------|
| Tap water  | 0.05                        | 0.0509                        | 0.00216                   | 101.8        |
|            | 0.2                         | 0.196                         | 0.0083                    | 98           |
|            | 1                           | 1.005                         | 0.0493                    | 100.5        |
| Lake water | 0.1                         | 0.100                         | 0.00532                   | 100          |
|            | 0.5                         | 0.498                         | 0.0225                    | 99.6         |
|            | 1                           | 1.03                          | 0.0342                    | 103          |

\* The mean value of average concentration calculated from 10 tests.

Table S2 Comparison of the analytical performance of different acetamiprid detection methods

| Alagnosis Method                                                                    | Linear Calibrations Range (nmol/L) | Detection Limit (nmol/L) | Reference                   |
|-------------------------------------------------------------------------------------|------------------------------------|--------------------------|-----------------------------|
| High-Performance Liquid Chromatography with a C-18 column and diode-array detection | 224.547 ~ 44909.507                | 44.91                    | (Obana et al. 2002)         |
| Gas Chromatography–mass spectrometry- mass spectrometry                             | -                                  | 4.491                    | (Mateu-Sanchez et al. 2003) |
| High-performance liquid chromatography coupled with UV-Vis detector                 | 0.000359 ~ 0.449                   | 30.089                   | (Zhou, Ding and Xiao 2006)  |
| Liquid chromatography–mass spectrometry                                             | 2250 ~ 22500                       | 135                      | (Fidente et al. 2005)       |
| Liquid Chromatography–mass spectrometry                                             | -                                  | 449.095                  | (Obana et al. 2003)         |
| Ultra performance liquid chromatography- mass spectrometry- mass spectrometry       | 0.112 ~ 673.643                    | 5.838                    | (Liu et al. 2010)           |
| Colorimetric assays based on aggregation-induced red-to-blue color transition       | 660 ~ 6600                         | 44                       | (Xu et al. 2011)            |
| Derivative spectrophotometric method in the presence of 6-                          | 3690 ~ 62000                       | 719                      | (Guzsvany et al. 2012)      |

|                                                                                                |                 |          |                         |
|------------------------------------------------------------------------------------------------|-----------------|----------|-------------------------|
| chloronicotinic acid                                                                           |                 |          |                         |
| Chemiluminescence aptasensor                                                                   | 0.8 ~ 630       | 0.062    | (Qi et al. 2016)        |
| Colorimetric aptasensor based on hemin-functionalized reduced graphene oxide                   | 100 ~ 60000     | 40       | (Yang et al. 2015)      |
| ELISA using Monoclonal antibodies specific to acetamiprid                                      | 1.35 ~ 56       | 0.00449  | (Watanabe et al. 2006)  |
| Electrochemical impedance spectroscopy-based aptasensor                                        | 5 ~ 600         | 1        | (Fan et al. 2013)       |
| Silver nanoparticles anchored on nitrogen-doped graphene as a novel electrochemical biosensing | 0.0001 ~ 5      | 0.000033 | (Jiang et al. 2015)     |
| Electrochemical sensor                                                                         | 0.01 ~ 2        | 0.2      | (Jin et al. 2016)       |
| Solid-phase extraction/liquid chromatography–mass spectrometry                                 | 220 ~ 2200      | 90       | (Di Muccio et al. 2006) |
| Electrochemical impedance spectroscopy -based aptasensor                                       | 0.00005 ~ 10000 | 0.000017 | (Fei et al. 2015)       |
| Electrochemical sensor                                                                         | 13300 ~ 212000  | 40000    | (Guzsvany et al. 2008)  |
| Aptamersensor based on FRET                                                                    | 10~10000        | 20       | This work               |

## Reference

- Di Muccio, A., P. Fidente, D. A. Barbini, R. Dommarco, S. Seccia & P. Morrica (2006) Application of solid-phase extraction and liquid chromatography-mass spectrometry to the determination of neonicotinoid pesticide residues in fruit and vegetables. *Journal of Chromatography A*, 1108, 1-6.
- Fan, L., G. Zhao, H. Shi, M. Liu & Z. Li (2013) A highly selective electrochemical impedance spectroscopy-based aptasensor for sensitive detection of acetamiprid. *Biosensors & Bioelectronics*, 43, 12-18.
- Fei, A., Q. Liu, J. Huan, J. Qian, X. Dong, B. Qiu, H. Mao & K. Wang (2015) Label-free impedimetric aptasensor for detection of femtomole level acetamiprid using gold nanoparticles decorated multiwalled carbon nanotube-reduced graphene oxide nanoribbon composites. *Biosensors & Bioelectronics*, 70, 122-129.
- Fidente, P., S. Seccia, F. Vanni & P. Morrica (2005) Analysis of nicotinoid insecticides residues in honey by solid matrix partition clean-up and liquid chromatography-electrospray mass spectrometry. *Journal of Chromatography A*, 1094, 175-178.

- Guzsvany, V., M. Kadar, Z. Papp, L. Bjelica, F. Gaal & K. Toth (2008) Monitoring of photocatalytic degradation of selected neonicotinoid insecticides by cathodic voltammetry with a bismuth film electrode. *Electroanalysis*, 20, 291-300.
- Guzsvany, V. J., S. D. Lazic, N. Vidakovic & Z. J. Papp (2012) Derivative spectrophotometric determination of acetamiprid in the presence of 6-chloronicotinic acid. *Journal of the Serbian Chemical Society*, 77, 911-917.
- Jiang, D., X. Du, Q. Liu, L. Zhou, L. Dai, J. Qian & K. Wang (2015) Silver nanoparticles anchored on nitrogen-doped graphene as a novel electrochemical biosensing platform with enhanced sensitivity for aptamer-based pesticide assay. *Analyst*, 140, 6404-6411.
- Jin, D., Q. Xu, L. Yu, A. Mao & X. Hu (2016) A novel sensor for the detection of acetamiprid in vegetables based on its photocatalytic degradation compound. *Food Chemistry*, 194, 959-965.
- Liu, S., Z. Zheng, F. Wei, Y. Ren, W. Gui, H. Wu & G. Zhu (2010) Simultaneous Determination of Seven Neonicotinoid Pesticide Residues in Food by Ultrapformance Liquid Chromatography Tandem Mass Spectrometry. *Journal of Agricultural and Food Chemistry*, 58, 3271-3278.
- Mateu-Sanchez, M., M. Moreno, F. J. Arrebola & J. L. M. Vidal (2003) Analysis of acetamiprid in vegetables using gas chromatography-tandem mass spectrometry. *Analytical Sciences*, 19, 701-704.
- Obana, H., M. Okihashi, K. Akutsu, Y. Kitagawa & S. Hori (2002) Determination of acetamiprid, imidacloprid, and nitenpyram residues in vegetables and fruits by high-performance liquid chromatography with diode-array detection. *Journal of Agricultural and Food Chemistry*, 50, 4464-4467.
- (2003) Determination of neonicotinoid pesticide residues in vegetables and fruits with solid phase extraction and liquid chromatography mass spectrometry. *Journal of Agricultural and Food Chemistry*, 51, 2501-2505.
- Qi, Y., F.-R. Xiu, M. Zheng & B. Li (2016) A simple and rapid chemiluminescence aptasensor for acetamiprid in contaminated samples: Sensitivity, selectivity and mechanism. *Biosensors & Bioelectronics*, 83, 243-249.
- Watanabe, E., S. Miyake, K. Baba, H. Eun & S. Endo (2006) Immunoassay for acetamiprid detection: application to residue analysis and comparison with liquid chromatography. *Analytical and Bioanalytical Chemistry*, 386, 1441-1448.
- Xu, Q., S. Du, G.-d. Jin, H. Li & X. Y. Hu (2011) Determination of acetamiprid by a colorimetric method based on the aggregation of gold nanoparticles. *Microchimica Acta*, 173, 323-329.
- Yang, Z., J. Qian, X. Yang, D. Jiang, X. Du, K. Wang, H. Mao & K. Wang (2015) A facile label-free colorimetric aptasensor for acetamiprid based on the peroxidase-like activity of hemin-functionalized reduced graphene oxide. *Biosensors & Bioelectronics*, 65, 39-46.
- Zhou, Q., Y. Ding & J. Xiao (2006) Sensitive determination of thiamethoxam, imidacloprid and acetamiprid in environmental water samples with solid-phase extraction packed with multiwalled carbon nanotubes prior to high-performance liquid chromatography. *Analytical and Bioanalytical Chemistry*, 385, 1520-1525.
